# Supplementary figures and images for: "still Here, Trying To Find My Way": Understanding The Experiences Of Hiv Disruption And Reorganization Among Older African Americans In Detroit
Source: Springer Nature journal article supplement (doi:10.1186/1749-8090-8-161), 2012-01-01

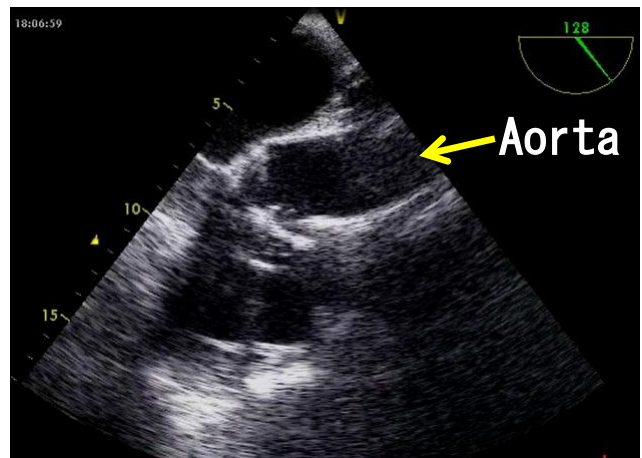

A

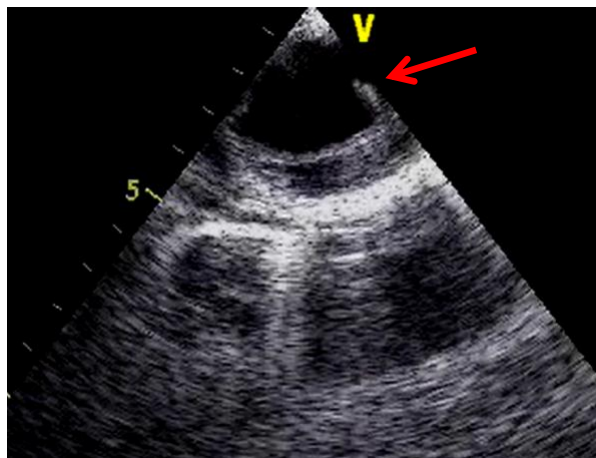

B

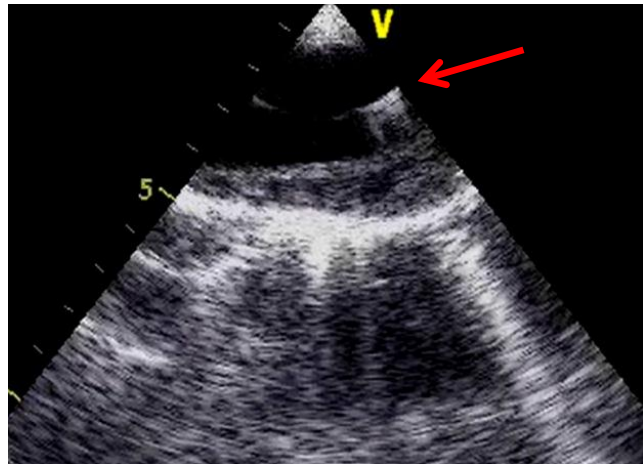

C

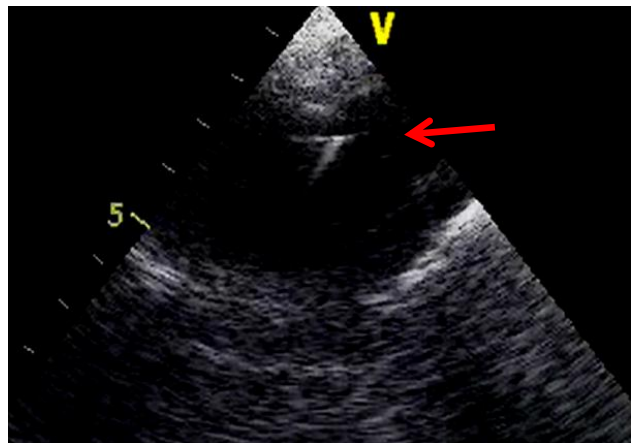

D

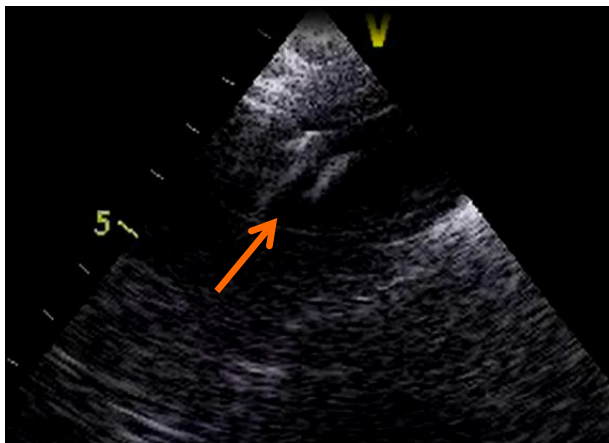

E

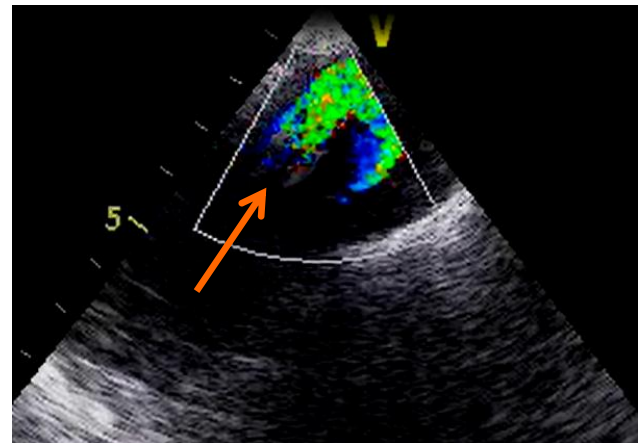

F

Supplement: 13019_2013_815_MOESM3_ESM.pdf [file 13019_2013_815_MOESM3_ESM.pdf]
